# Supplementary material for: Genetic Characterization of Human Influenza Viruses in the Pandemic (2009–2010) and Post-Pandemic (2010–2011) Periods in Japan
Source: PLoS One. 2012 Jun 27;7(6):e36455. doi: 10.1371/journal.pone.0036455 (PMC3384667; doi:10.1371/journal.pone.0036455)
Supplement: Table S2 — Hemagglutination inhibition (HI) titer of selected A(H3N2) viruses from the 2010–2011 season. (XLS) [file pone.0036455.s003.xls]

## Sheet: HI_H3N2
Table S2. Hemagglutination inhibition (HI) titer of selected A(H3N2) viruses from the 2010-2011 season.
Viruses	Collection Date	HI titer	Mutations
		A/Vic210/09
Reference Viruses
A/Victoria/210/2009	2009-06-02	80
Test Viruses
Perth16 clade			(compared with A/Perth16/2009)
A/Niigata/10F004/2011	2011-01-14	40	N81D, P162S, S214I, I260M, R261Q
A/Niigata/10F013/2011	2011-01-17	40	N81D, P162S, S214I, I260M, R261Q
A/Niigata/10F028/2011	2011-01-19	40	N81D, P162S, S214I, I260M, R261Q
A/Niigata/10F116/2011	2011-01-25	40	N81D, P162S, S214I, I260M, R261Q
A/Niigata/10F271/2011	2011-02-03	160	N81D, P162S, S214I, I260M, R261Q
A/Niigata/10F409/2011	2011-02-12	80	N81D, P162S, S214I, I260M, R261Q
A/Niigata/10F433/2011	2011-02-15	80	N81D, P162S, S214I, I260M, R261Q
A/Niigata/10F507/2011	2011-02-25	20	N81D, P162S, S214I, I260M, R261Q
A/Niigata/10F528/2011	2011-03-01	80	N81D, P162S, S214I, I260M, R261Q
A/Niigata/10F552/2011	2011-03-07	160	N81D, P162S, S214I, I260M, R261Q
A/Niigata/10F079/2011	2011-01-24	40	N81D, P162S, S214I, I260M, R261Q, K92R
A/Niigata/10F358/2011	2011-02-08	640	N81D, P162S, S214I, I260M, R261Q, K92R
A/Niigata/10F492/2011	2011-02-22	80	N81D, P162S, S214I, I260M, R261Q, Q57K
